# Supplementary material for: Cyanidin-3-O-glucoside and protocatechuic acid alleviate heat stress-induced testicular damage
Source: Royal Society of Chemistry journal article supplement (doi:10.1039/d2fo03423a), 2023-01-01
Supplement: d2fo03423a1.pdf [file d2fo03423a1.pdf]

1 **Supplementary Information**

2 **Cyanidin-3-*O*-glucoside and protocatechuic acid alleviates heat stress-induced**  
3 **testicular damage**

4

5 **Dongbao Cai <sup>a</sup>, Xusheng Li <sup>a</sup>, Qingjie Xu <sup>a</sup>, Haiwei Li <sup>a</sup>, Ruijing Liu <sup>a</sup>, Jiali Chen**  
6 **<sup>a</sup>, Xinwei Jiang <sup>a</sup>, Jianxia Sun <sup>b</sup>, Caiyong Lai <sup>c</sup>, Weibin Bai <sup>a,\*</sup>**

7

8 <sup>a</sup> Department of Food Science and Engineering, Institute of Food Safety and Nutrition,

9 Guangdong Engineering Technology Center of Food Safety Molecular Rapid

10 Detection, Jinan University, Guangzhou, 510632, PR China

11 <sup>b</sup> School of Chemical Engineering and Light Industry, Guangdong University of

12 Technology, Guangzhou, 510006, PR China

13 <sup>c</sup> Department of Urology, The First Affiliated Hospital of Jinan University,

14 Guangzhou 510630, PR China.

15 \* Corresponding author: Weibin Bai, Ph.D., Department of Food Science and

16 Engineering, Institute of Food Safety and Nutrition, Jinan University, 601 Huangpu

17 Rd, Guangzhou 510632, PR China. Tel: +86 13822283521, +86-020-85226630, Fax:

18 +86-020-85226635, E-mail: [baiweibin@163.com](mailto:baiweibin@163.com)

19 **Table S1.** Primer sequence for qPCR in this study

| Gene                           | Forward primer (5'→3')   | Reverse primer (5'→3') |
|--------------------------------|--------------------------|------------------------|
| <i>Beta-actin</i>              | GGGAAATCGTGCGTGAC        | AGGCTGGAAAAGAGCCT      |
| <i>XBPI</i>                    | GACAGAGAGTCAAACCTAACGTGG | GTCCAGCAGGCAAGAAGGT    |
| <i>IRE1<math>\alpha</math></i> | GCCGAAGTTCAGATGGAATC     | ATCAGCAAAGGCCGATGA     |

20

21

22 **Table S2.** Sperm motility parameter. The cauda epididymis from mice

| Groups | Time (day) | Control                 | HS                       | C3G+HS                  | PCA+HS                   | Vit C+HS                |
|--------|------------|-------------------------|--------------------------|-------------------------|--------------------------|-------------------------|
| VSL    | 0 d        | 28.20±2.31 <sup>a</sup> | 19.47±2.30 <sup>a</sup>  | 22.31±3.25 <sup>a</sup> | 22.13±4.10 <sup>a</sup>  | 21.85±1.39 <sup>a</sup> |
|        | 2 d        | 20.55±4.19 <sup>a</sup> | 19.29±4.27 <sup>a</sup>  | 12.58±2.21 <sup>a</sup> | 16.61±1.66 <sup>a</sup>  | 14.61±3.08 <sup>a</sup> |
|        | 7 d        | 37.96±5.92 <sup>a</sup> | 23.56±4.27 <sup>ab</sup> | 16.42±3.53 <sup>b</sup> | 29.72±4.16 <sup>ab</sup> | 19.19±4.21 <sup>b</sup> |
|        | 14 d       | 44.63±3.97 <sup>a</sup> | 8.31±2.34 <sup>b</sup>   | 11.91±3.54 <sup>b</sup> | 4.97±0.85 <sup>b</sup>   | 8.58±2.15 <sup>b</sup>  |
|        | 21 d       | 31.59±3.76 <sup>a</sup> | 8.39±1.57 <sup>b</sup>   | 7.73±0.93 <sup>b</sup>  | 7.89±2.29 <sup>b</sup>   | 5.47±0.76 <sup>b</sup>  |
| VCL    | 0 d        | 30.10±2.51 <sup>a</sup> | 20.77±2.47 <sup>a</sup>  | 23.65±3.40 <sup>a</sup> | 23.63±4.41 <sup>a</sup>  | 23.42±1.48 <sup>a</sup> |
|        | 2 d        | 21.86±4.45 <sup>a</sup> | 20.55±4.60 <sup>a</sup>  | 13.38±2.33 <sup>a</sup> | 17.78±1.79 <sup>a</sup>  | 15.64±3.30 <sup>a</sup> |
|        | 7 d        | 41.43±6.57 <sup>a</sup> | 25.50±4.65 <sup>ab</sup> | 17.75±3.85 <sup>b</sup> | 32.25±4.53 <sup>ab</sup> | 20.78±4.59 <sup>b</sup> |
|        | 14 d       | 48.09±4.34 <sup>a</sup> | 8.84±2.51 <sup>b</sup>   | 12.78±3.81 <sup>b</sup> | 5.55±1.06 <sup>b</sup>   | 9.24±2.33 <sup>b</sup>  |
|        | 21 d       | 33.89±4.07 <sup>a</sup> | 9.21±1.71 <sup>b</sup>   | 8.33±0.98 <sup>b</sup>  | 8.51±2.47 <sup>b</sup>   | 5.62±0.70 <sup>b</sup>  |
| VAP    | 0 d        | 21.13±1.76 <sup>a</sup> | 14.58±1.73 <sup>a</sup>  | 16.60±2.38 <sup>a</sup> | 16.59±3.10 <sup>a</sup>  | 16.44±1.04 <sup>a</sup> |
|        | 2 d        | 15.35±3.12 <sup>a</sup> | 14.42±3.23 <sup>a</sup>  | 9.39±1.64 <sup>a</sup>  | 12.48±1.26 <sup>a</sup>  | 10.98±2.32 <sup>a</sup> |
|        | 7 d        | 29.08±4.61 <sup>a</sup> | 17.90±3.27 <sup>ab</sup> | 12.46±2.71 <sup>b</sup> | 22.64±3.18 <sup>ab</sup> | 14.59±3.22 <sup>b</sup> |
|        | 14 d       | 33.76±3.05 <sup>a</sup> | 6.21±1.76 <sup>b</sup>   | 8.97±2.67 <sup>b</sup>  | 3.90±0.74 <sup>b</sup>   | 6.49±1.63 <sup>b</sup>  |
|        | 21 d       | 23.80±2.86 <sup>a</sup> | 6.46±1.20 <sup>b</sup>   | 5.85±0.69 <sup>b</sup>  | 5.97±1.73 <sup>b</sup>   | 3.94±0.49 <sup>b</sup>  |
| ALH    | 0 d        | 8.97±0.75 <sup>a</sup>  | 6.19±0.74 <sup>a</sup>   | 7.05±1.01 <sup>a</sup>  | 7.04±1.31 <sup>a</sup>   | 6.98±0.44 <sup>a</sup>  |
|        | 2 d        | 6.51±1.32 <sup>a</sup>  | 6.12±1.37 <sup>a</sup>   | 3.99±0.70 <sup>a</sup>  | 5.30±0.53 <sup>a</sup>   | 4.66±0.98 <sup>a</sup>  |
|        | 7 d        | 12.34±1.96 <sup>a</sup> | 7.60±1.39 <sup>ab</sup>  | 5.29±1.15 <sup>b</sup>  | 9.61±1.35 <sup>ab</sup>  | 6.19±1.37 <sup>b</sup>  |
|        | 14 d       | 14.33±1.29 <sup>a</sup> | 2.63±0.75 <sup>b</sup>   | 3.81±1.14 <sup>b</sup>  | 1.66±0.32 <sup>b</sup>   | 2.75±0.69 <sup>b</sup>  |
|        | 21 d       | 10.10±1.21 <sup>a</sup> | 2.74±0.51 <sup>b</sup>   | 2.48±0.29 <sup>b</sup>  | 2.53±0.74 <sup>b</sup>   | 1.68±0.21 <sup>b</sup>  |
| BCF    | 0 d        | 4.48±0.41 <sup>a</sup>  | 3.27±0.51 <sup>a</sup>   | 4.04±0.60 <sup>a</sup>  | 4.36±1.12 <sup>a</sup>   | 3.80±0.50 <sup>a</sup>  |
|        | 2 d        | 4.41±1.04 <sup>a</sup>  | 4.32±1.26 <sup>a</sup>   | 2.42±0.50 <sup>a</sup>  | 3.56±0.57 <sup>a</sup>   | 3.05±0.76 <sup>a</sup>  |
|        | 7 d        | 9.03±1.93 <sup>a</sup>  | 5.24±1.24 <sup>a</sup>   | 3.86±1.00 <sup>a</sup>  | 7.05±1.22 <sup>a</sup>   | 4.13±1.22 <sup>a</sup>  |
|        | 14 d       | 9.42±1.49 <sup>a</sup>  | 1.26±0.59 <sup>b</sup>   | 1.90±0.86 <sup>b</sup>  | 0.43±0.06 <sup>b</sup>   | 1.04±0.33 <sup>b</sup>  |
|        | 21 d       | 7.13±0.98 <sup>a</sup>  | 0.86±0.21 <sup>b</sup>   | 0.79±0.13 <sup>b</sup>  | 1.03±0.53 <sup>b</sup>   | 0.53±0.11 <sup>b</sup>  |
| LIN    | 0 d        | 0.94±0.00 <sup>a</sup>  | 0.93±0.01 <sup>a</sup>   | 0.94±0.00 <sup>a</sup>  | 0.93±0.01 <sup>a</sup>   | 0.93±0.00 <sup>a</sup>  |
|        | 2 d        | 0.93±0.01 <sup>a</sup>  | 0.92±0.02 <sup>a</sup>   | 0.94±0.00 <sup>a</sup>  | 0.94±0.00 <sup>a</sup>   | 0.93±0.01 <sup>a</sup>  |
|        | 7 d        | 0.91±0.01 <sup>a</sup>  | 0.88±0.03 <sup>a</sup>   | 0.89±0.02 <sup>a</sup>  | 0.92±0.00 <sup>a</sup>   | 0.86±0.04 <sup>a</sup>  |
|        | 14 d       | 0.93±0.01 <sup>a</sup>  | 0.61±0.09 <sup>a</sup>   | 0.68±0.11 <sup>a</sup>  | 0.64±0.06 <sup>a</sup>   | 0.73±0.08 <sup>a</sup>  |
|        | 21 d       | 0.93±0.01 <sup>a</sup>  | 0.77±0.05 <sup>ab</sup>  | 0.78±0.04 <sup>ab</sup> | 0.67±0.09 <sup>b</sup>   | 0.66±0.06 <sup>b</sup>  |
| MAD    | 0 d        | 4.78±0.44 <sup>a</sup>  | 3.50±0.55 <sup>a</sup>   | 4.30±0.63 <sup>a</sup>  | 4.67±1.21 <sup>a</sup>   | 4.08±0.55 <sup>a</sup>  |
|        | 2 d        | 4.70±1.11 <sup>a</sup>  | 4.61±1.35 <sup>a</sup>   | 2.58±0.53 <sup>a</sup>  | 3.81±0.61 <sup>a</sup>   | 3.86±1.02 <sup>a</sup>  |
|        | 7 d        | 10.51±2.53 <sup>a</sup> | 5.67±1.34 <sup>a</sup>   | 4.17±1.09 <sup>a</sup>  | 7.67±1.33 <sup>a</sup>   | 4.49±1.33 <sup>a</sup>  |
|        | 14 d       | 10.18±1.63 <sup>a</sup> | 1.35±0.64 <sup>b</sup>   | 2.04±0.93 <sup>b</sup>  | 0.47±0.07 <sup>b</sup>   | 1.12±0.36 <sup>b</sup>  |
|        | 21 d       | 7.66±1.07 <sup>a</sup>  | 0.93±0.22 <sup>b</sup>   | 0.85±0.14 <sup>b</sup>  | 1.12±0.57 <sup>b</sup>   | 0.76±0.22 <sup>b</sup>  |
| STR    | 0 d        | 1.34±0.00 <sup>a</sup>  | 1.33±0.01 <sup>a</sup>   | 1.34±0.00 <sup>a</sup>  | 1.32±0.02 <sup>a</sup>   | 1.33±0.01 <sup>a</sup>  |
|        | 2 d        | 1.32±0.02 <sup>a</sup>  | 1.31±0.02 <sup>a</sup>   | 1.34±0.01 <sup>a</sup>  | 1.33±0.00 <sup>a</sup>   | 1.31±0.02 <sup>a</sup>  |
|        | 7 d        | 1.29±0.02 <sup>a</sup>  | 1.26±0.05 <sup>a</sup>   | 1.27±0.03 <sup>a</sup>  | 1.31±0.00 <sup>a</sup>   | 1.23±0.06 <sup>a</sup>  |
|        | 14 d       | 1.32±0.00 <sup>a</sup>  | 0.87±0.13 <sup>a</sup>   | 0.97±0.16 <sup>a</sup>  | 0.91±0.08 <sup>a</sup>   | 1.04±0.12 <sup>a</sup>  |
|        | 21 d       | 1.33±0.00 <sup>a</sup>  | 1.09±0.07 <sup>ab</sup>  | 1.11±0.05 <sup>ab</sup> | 0.96±0.12 <sup>b</sup>   | 0.94±0.09 <sup>b</sup>  |

23 \*Comparison between all groups was evaluated through One-way ANOVA. Data were shown as  
 24 Mean ± SEM. n=7 at day 0 and day 2, n=12 at day 7, day 14, and day 21. Different letters indicate

25 a significant difference between the groups at the equal treating time point.

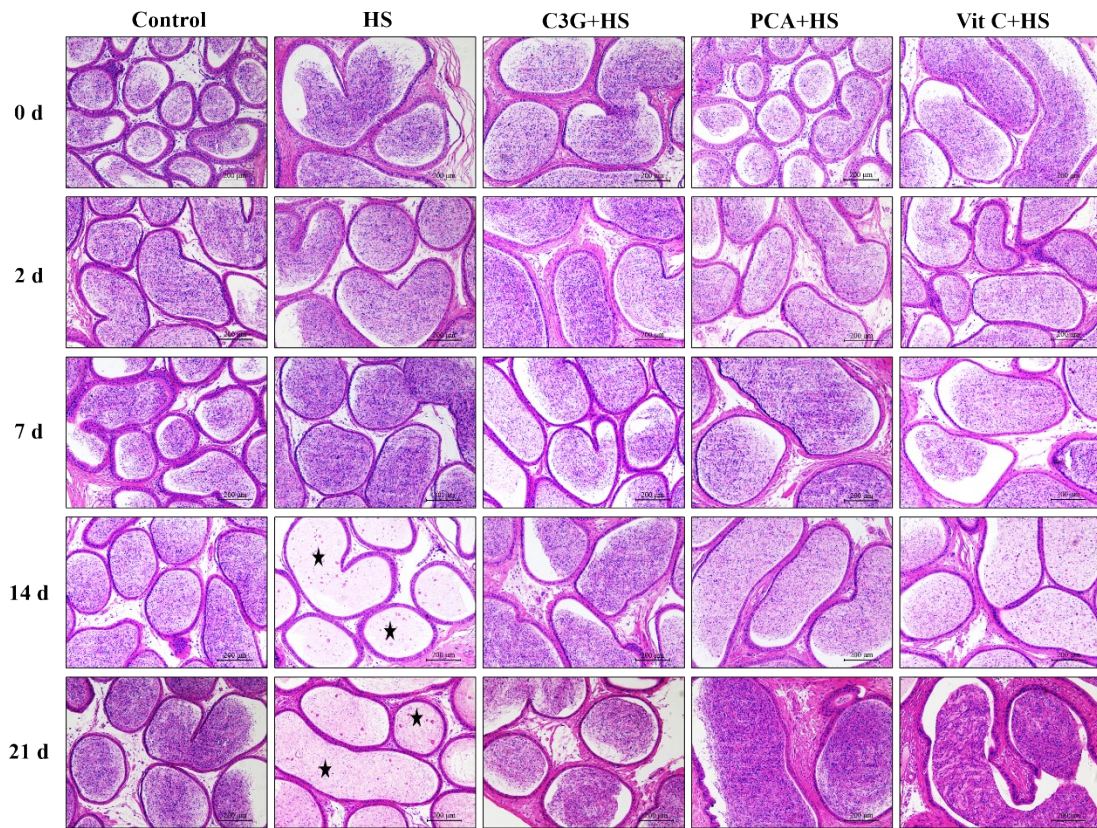

26

27 **Figure S1.** The representative H&E staining histopathology of epididymis

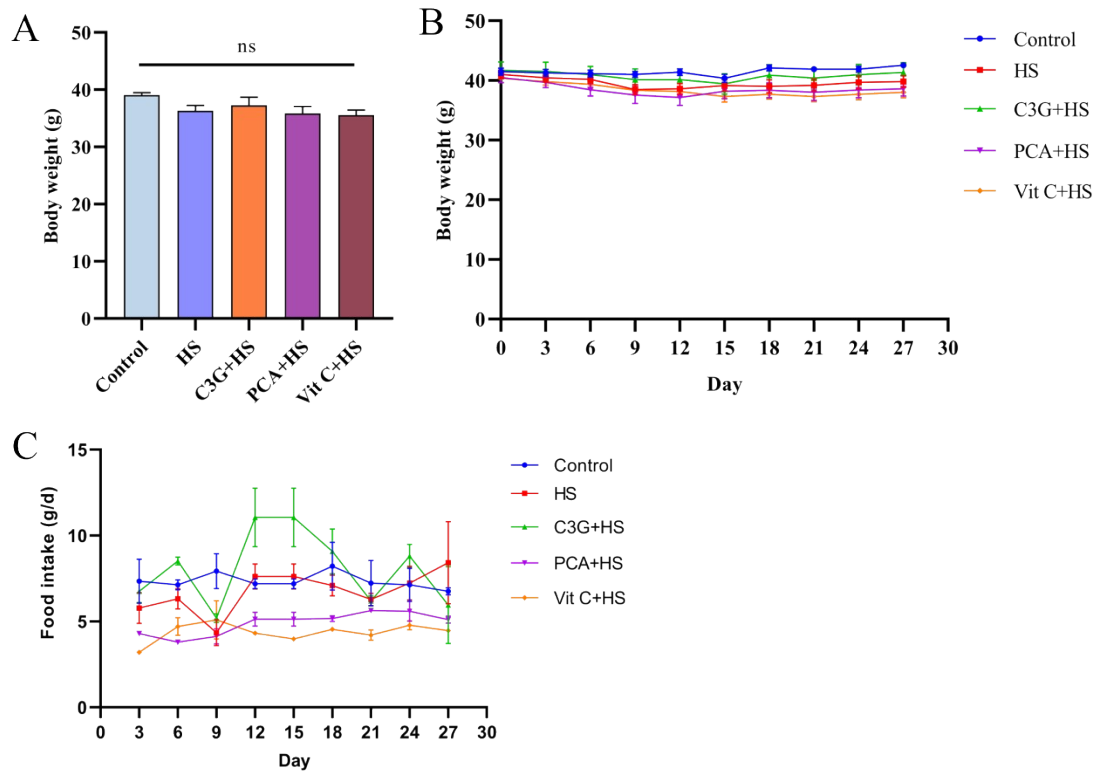

28

29 **Figure S2.** The changes of body weight and food intake. (A) The terminal body weight  
 30 of mice at day 21. (B) The changes of body weight during the whole processing at day  
 31 21. (C) The changes of food intake during the whole processing at day 21. Comparison  
 32 between all groups was evaluated through One-way ANOVA. Data were shown as  
 33 Mean  $\pm$  SEM. n=12. Different letters indicate a significant difference.

34

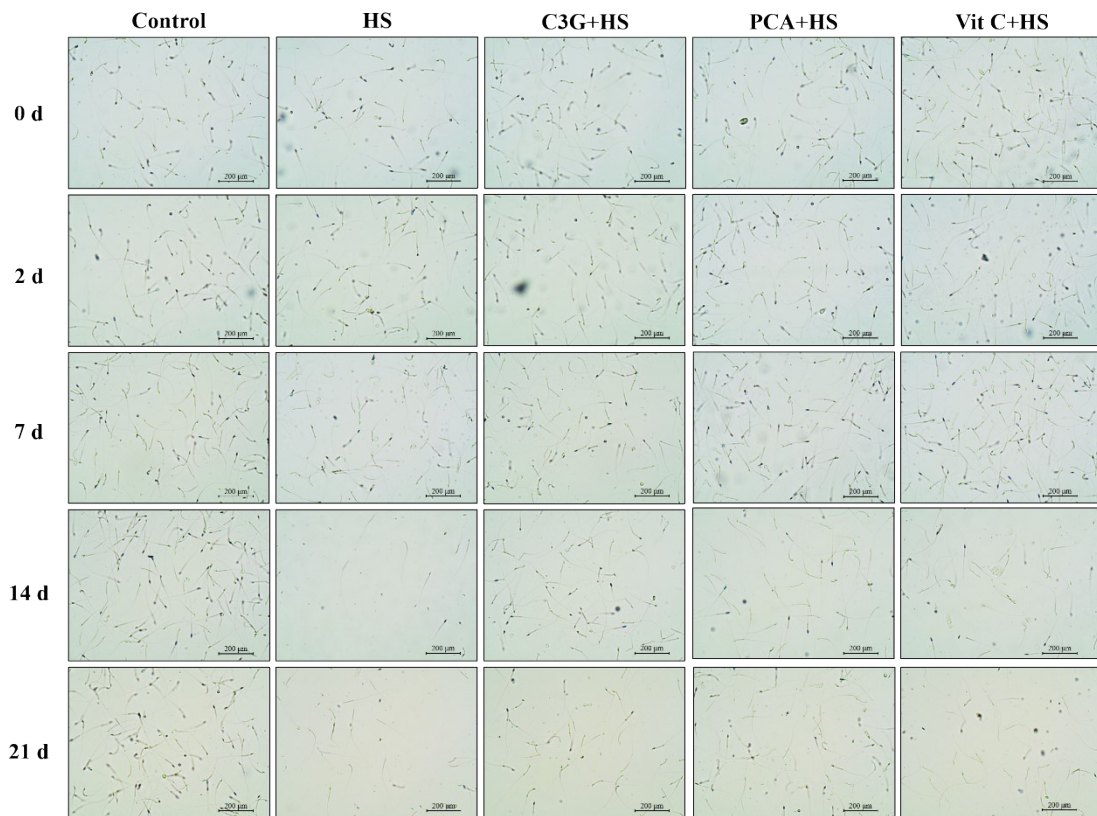

35

36 **Figure S3.** The sperm captures during different period by CASA
